# Supplementary material for: Preparing Unbiased T-Cell Receptor and Antibody cDNA Libraries for the Deep Next Generation Sequencing Profiling
Source: Front Immunol. 2013 Dec 23;4:456. doi: 10.3389/fimmu.2013.00456 (PMC3870325; doi:10.3389/fimmu.2013.00456)
Supplement: Supplementary file 1 [file 51408_Chudakov_DataSheet1.DOC]

**Supplementary Table 1.**

160 5-digit sample barcodes.

Barcodes differing by less than 2 nucleotides are excluded.

For each sample, the same or 3 different barcodes can be introduced within the 5’ switch adapter, and within 5’ and 3’ primers used for the 2nd PCR amplification step.

Primer names can include the sample barcode index, for example:

Smart_i101

Step_ i176

TRBC_H_i232

| AAACT | i101 |
| --- | --- |
| AAAGA | i102 |
| AACGG | i103 |
| AACTC | i104 |
| AAGAG | i105 |
| AAGCC | i106 |
| AAGGT | i107 |
| AATGC | i108 |
| AATTG | i109 |
| ACAAT | i110 |
| ACCAA | i111 |
| ACCCT | i112 |
| ACCTG | i113 |
| ACGCG | i114 |
| ACGGC | i115 |
| ACTCC | i116 |
| ACTGA | i117 |
| AGACA | i118 |
| AGAGT | i119 |
| AGATG | i120 |
| AGCAC | i121 |
| AGCCG | i122 |
| AGCTA | i123 |
| AGGCT | i124 |
| AGGGA | i125 |
| AGGTC | i126 |
| AGTAA | i127 |
| AGTGG | i128 |
| AGTTT | i129 |
| ATACC | i130 |
| ATAGG | i131 |
| ATATT | i132 |
| ATCGC | i133 |
| ATGAC | i134 |
| ATGCA | i135 |
| ATGTG | i136 |
| ATTCG | i137 |
| ATTGT | i138 |
| ATTTC | i139 |
| CAAGG | i140 |
| CACAG | i141 |
| CACCA | i142 |
| CAGAT | i143 |
| CAGCG | i144 |
| CATAA | i145 |
| CATCT | i146 |
| CATTC | i147 |
| CCATG | i148 |
| CCCAT | i149 |
| CCCGC | i150 |
| CCGAA | i151 |
| CCGCT | i152 |
| CCGGG | i153 |
| CCGTC | i154 |
| CCTAG | i155 |
| CCTGT | i156 |
| CGAAG | i157 |
| CGACT | i158 |
| CGAGC | i159 |
| CGCAA | i160 |
| CGCGG | i161 |
| CGCTT | i162 |
| CGGCC | i163 |
| CGGGT | i164 |
| CGTAT | i165 |
| CGTCG | i166 |
| CGTGA | i167 |
| CTAAA | i168 |
| CTACG | i169 |
| CTAGT | i170 |
| CTATC | i171 |
| CTCCT | i172 |
| CTCTG | i173 |
| CTGAG | i174 |
| CTGGA | i175 |
| CTGTT | i176 |
| CTTAC | i177 |
| CTTGG | i178 |
| CTTTA | i179 |
| GAAAT | i180 |
| GAATC | i181 |
| GACAA | i182 |
| GACCC | i183 |
| GACTT | i184 |
| GAGCA | i185 |
| GAGGG | i186 |
| GATAC | i187 |
| GATCG | i188 |
| GATGT | i189 |
| GCAAA | i190 |
| GCAGT | i191 |
| GCCCA | i192 |
| GCCGG | i193 |
| GCCTC | i194 |
| GCGAG | i195 |
| GCGCC | i196 |
| GCGGA | i197 |
| GCGTT | i198 |
| GCTCT | i199 |
| GCTGC | i200 |
| GCTTA | i201 |
| GGACC | i202 |
| GGAGG | i203 |
| GGATA | i204 |
| GGCAT | i205 |
| GGCGC | i206 |
| GGCTG | i207 |
| GGGAC | i208 |
| GGGCG | i209 |
| GGTAG | i210 |
| GGTCA | i211 |
| GGTTC | i212 |
| GTAAG | i213 |
| GTAGC | i214 |
| GTCAC | i215 |
| GTCCG | i216 |
| GTCGT | i217 |
| GTCTA | i218 |
| GTGAA | i219 |
| GTGCT | i220 |
| GTGTC | i221 |
| GTTAT | i222 |
| GTTCC | i223 |
| GTTGA | i224 |
| GTTTG | i225 |
| TAAAG | i226 |
| TAACC | i227 |
| TAATA | i228 |
| TACAC | i229 |
| TACGT | i230 |
| TACTG | i231 |
| TAGAA | i232 |
| ~~TAGGC~~ | ~~i233~~ |
| TAGTT | i234 |
| TATAT | i235 |
| TATGA | i236 |
| TCATC | i237 |
| TCCAG | i238 |
| TCCTA | i239 |
| TCGAC | i240 |
| TCGTG | i241 |
| TCTGG | i242 |
| TCTTT | i243 |
| TGAAA | i244 |
| TGATT | i245 |
| TGCCT | i246 |
| TGCTC | i247 |
| TGGCA | i248 |
| TGTCC | i249 |
| TGTGT | i250 |
| TGTTA | i251 |
| TTAAT | i252 |
| TTATG | i253 |
| TTCCC | i254 |
| TTCGA | i255 |
| TTCTT | i256 |
| TTGCG | i257 |
| TTTAG | i258 |
| TTTCT | i259 |
| TTTGC | i260 |
